# Supplementary material for: Physician education can minimize inappropriate steroid use in patients with inflammatory bowel disease: the ACTION study
Source: PubMed Central journal article supplement — Intest Res. 2022 Mar 11;20(4):452–63. doi: 10.5217/ir.2021.00125 (PMC9650332; doi:10.5217/ir.2021.00125), 2022-03-11
Supplement: ir-2021-00125-suppl1.pdf [file ir-2021-00125-suppl1.pdf]

See “Physician education can minimize inappropriate steroid use in patients with inflammatory bowel disease: the ACTION study” on pages 452-463.

**Supplementary Table 1.** ECCO Guidelines Used to Educate Physicians for the Management of Steroid Use in Patients with CD

| Medical management of active CD per ECCO guidelines |                                                                                                                                                                                                                                                                                                                                                                                                                                                                                                                                                                                                                                                                                                                                                                                                                                                                                                                                                                                                      |
|-----------------------------------------------------|------------------------------------------------------------------------------------------------------------------------------------------------------------------------------------------------------------------------------------------------------------------------------------------------------------------------------------------------------------------------------------------------------------------------------------------------------------------------------------------------------------------------------------------------------------------------------------------------------------------------------------------------------------------------------------------------------------------------------------------------------------------------------------------------------------------------------------------------------------------------------------------------------------------------------------------------------------------------------------------------------|
| Mildly active ileocecal CD                          | <p>ECCO statement 5B</p> <ul style="list-style-type: none"> <li>Oral budesonide is the preferred treatment</li> </ul>                                                                                                                                                                                                                                                                                                                                                                                                                                                                                                                                                                                                                                                                                                                                                                                                                                                                                |
| Moderately active ileocecal CD                      | <p>ECCO statement 5C</p> <ul style="list-style-type: none"> <li>Moderately active localized ileocecal CD should be treated with budesonide, or with systemic corticosteroids</li> <li>An anti-TNF based strategy should be used as an alternative for patients, who have previously been steroid-refractory or intolerant</li> <li>For some patients who have infrequently relapsing disease restarting steroids with an immunomodulator may be appropriate</li> <li>In patients refractory to steroids and/or anti-TNF, vedolizumab is an appropriate alternative</li> </ul>                                                                                                                                                                                                                                                                                                                                                                                                                        |
| Severely active ileocecal CD                        | <p>ECCO statement 5D</p> <ul style="list-style-type: none"> <li>Severely active localized ileocecal CD should initially be treated with systemic corticosteroids</li> <li>For those who have relapsed, an anti-TNF based strategy is appropriate</li> <li>Surgery is a reasonable alternative for patients with disease refractory to conventional medical treatment and should also be discussed</li> <li>For some patients who have infrequently relapsing disease, restarting steroids with an immunomodulator may be appropriate</li> <li>In patients refractory to steroids and/or anti-TNF, vedolizumab is an appropriate alternative</li> </ul> <p>ECCO statement 5E</p> <ul style="list-style-type: none"> <li>Active colonic CD should be treated with systemic corticosteroids</li> <li>For those who have relapsed, an anti-TNF based strategy is an appropriate option</li> <li>In patients refractory to steroids and/or anti-TNF, vedolizumab is an appropriate alternative</li> </ul> |
| Extensive small bowel disease                       | <p>ECCO statement 5F</p> <ul style="list-style-type: none"> <li>Extensive small bowel CD should initially be treated with systemic corticosteroids, but early therapy with an anti-TNF based strategy should also be evaluated</li> <li>For patients with severe disease who have relapsed, an anti-TNF based strategy is appropriate</li> </ul>                                                                                                                                                                                                                                                                                                                                                                                                                                                                                                                                                                                                                                                     |
| Esophageal and gastroduodenal disease               | <p>ECCO statement 5H</p> <ul style="list-style-type: none"> <li>Mild esophageal or gastroduodenal CD may be treated with a proton pump inhibitor only</li> <li>More severe or refractory disease requires additional systemic corticosteroids or an anti-TNF based strategy</li> <li>Dilatation or surgery are appropriate for symptomatic strictures</li> </ul>                                                                                                                                                                                                                                                                                                                                                                                                                                                                                                                                                                                                                                     |
| Management of medically induced remission           |                                                                                                                                                                                                                                                                                                                                                                                                                                                                                                                                                                                                                                                                                                                                                                                                                                                                                                                                                                                                      |
| Steroid-refractory CD                               | <p>ECCO statement 5I</p> <ul style="list-style-type: none"> <li>Patients with objective evidence of active disease refractory to corticosteroids should be treated with an anti-TNF based strategy, although surgical options should also be considered and discussed at an early stage</li> </ul>                                                                                                                                                                                                                                                                                                                                                                                                                                                                                                                                                                                                                                                                                                   |
| Steroid-dependent CD                                | <p>ECCO statement 6D</p> <ul style="list-style-type: none"> <li>Immunosuppressive naive patients who are dependent on corticosteroids should be treated with a thiopurine or methotrexate or anti-TNF based strategy</li> <li>Surgical options should also be discussed</li> </ul>                                                                                                                                                                                                                                                                                                                                                                                                                                                                                                                                                                                                                                                                                                                   |

ECCO, European Crohn's and Colitis Organisation; CD, Crohn's disease; TNF, tumor necrosis factor.
