# Supplementary material for: Physician education can minimize inappropriate steroid use in patients with inflammatory bowel disease: the ACTION study
Source: PubMed Central journal article supplement — Intest Res. 2022 Mar 11;20(4):452–63. doi: 10.5217/ir.2021.00125 (PMC9650332; doi:10.5217/ir.2021.00125), 2022-03-11
Supplement: ir-2021-00125-suppl9.pdf [file ir-2021-00125-suppl9.pdf]

**Supplementary Table 9.** Risk Factors Affecting Excessive Steroid Use or Inappropriate Steroid Use in Crohn's Disease in All Cohorts

| Risk factor                   | Excessive steroid use |         |                     | Inappropriate steroid use |         |          |
|-------------------------------|-----------------------|---------|---------------------|---------------------------|---------|----------|
|                               | Cohort 1              |         | Cohort 2            | Cohort 1                  |         | Cohort 2 |
|                               | OR (95% CI)           | P-value | OR (95% CI)         | OR (95% CI)               | P-value | P-value  |
| Age                           | 0.96 (0.92–1.01)      | 0.1257  | 1.02 (0.97–1.07)    | 1.02 (0.94–1.12)          | 0.6056  | 0.1159   |
| Sex (male vs. female)         | 0.87 (0.37–2.00)      | 0.7348  | 0.65 (0.21–2.03)    | 0.98 (0.17–5.49)          | 0.9801  | 0.2653   |
| CDAI score                    | 1.00 (1.00–1.01)      | 0.0345  | 1.01 (1.00–1.01)    | 1.00 (0.99–1.01)          | 0.8504  | 0.8570   |
| Phenotype: (A2+A3 vs. A1)     | 0.25 (0.03–1.95)      | 0.1851  | 2.17 (0.17–27.89)   | 2.00 (0.03–123.25)        | 0.7407  | 0.5115   |
| Phenotype: A (A1+A3 vs. A2)   | 0.22 (0.05–1.07)      | 0.0610  | 1.50 (0.22–10.02)   | 1.10 (0.05–24.66)         | 0.9503  | 0.4087   |
| Phenotype: L_1 (L2+L3 vs. L1) | 0.65 (0.24–1.79)      | 0.4043  | 1.09 (0.32–3.76)    | 0.87 (0.13–5.93)          | 0.8858  | 0.4956   |
| Phenotype: L_1 (L1+L3 vs. L2) | 1.35 (0.54–3.34)      | 0.5181  | 2.31 (0.76–7.02)    | 1.24 (0.16–9.44)          | 0.8367  | 0.6751   |
| Phenotype: L_2 (none vs. L4)  | 13.45 (0.24–754.83)   | 0.2060  | 10.38 (0.17–620.65) | 0.00 (0.00–1.00)          | 1       | 0.0628   |
| Phenotype: B B2+B3 vs. B1     | 0.54 (0.19–1.50)      | 0.2342  | 7.97 (0.55–115.66)  | 0.22 (0.03–1.45)          | 0.1150  | 0.9329   |
| Phenotype: B (B1+B3 vs. B2)   | 0.38 (0.11–1.33)      | 0.1291  | 8.38 (0.55–128.82)  | 0.32 (0.04–2.44)          | 0.2693  | 0.3515   |
| Surgical history (no vs. yes) | 1.52 (0.68–3.42)      | 0.3104  | 1.35 (0.48–3.79)    | 1.50 (0.29–7.89)          | 0.6313  | 0.2572   |
| IMM (no vs. yes)              | 0.57 (0.26–1.27)      | 0.1720  | 0.51 (0.18–1.44)    | 1.73 (0.36–8.37)          | 0.4954  | 0.0330   |

Phenotype A (A1, <17 yr; A2, 17–40 yr; A3 >40 yr), phenotype L (L1, ileal; L2, colonic; L3, ileocolonic; L4, isolated upper), and phenotype B (B1, non-stricturing/non-penetrating; B2, stricturing; B3, penetrating).

OR, odds ratio; CI, confidence interval; CDAI, Crohn's Disease Activity Index; IMM, Immunomodulator.
