# Supplementary material for: Physician education can minimize inappropriate steroid use in patients with inflammatory bowel disease: the ACTION study
Source: PubMed Central journal article supplement — Intest Res. 2022 Mar 11;20(4):452–63. doi: 10.5217/ir.2021.00125 (PMC9650332; doi:10.5217/ir.2021.00125), 2022-03-11
Supplement: ir-2021-00125-suppl11.pdf [file ir-2021-00125-suppl11.pdf]

**Supplementary Table 11.** Patients with Excessive Steroid Use According to Disease Activity in All Cohorts

| Classification | Crohn's disease |                 |                      |                 |                 |                      | Ulcerative colitis |                 |                      |                 |                 |                      |
|----------------|-----------------|-----------------|----------------------|-----------------|-----------------|----------------------|--------------------|-----------------|----------------------|-----------------|-----------------|----------------------|
|                | Cohort 1        |                 |                      | Cohort 2        |                 |                      | Cohort 1           |                 |                      | Cohort 2        |                 |                      |
|                | No<br>(n = 287) | Yes<br>(n = 10) | P-value <sup>a</sup> | No<br>(n = 346) | Yes<br>(n = 11) | P-value <sup>a</sup> | No<br>(n = 323)    | Yes<br>(n = 30) | P-value <sup>a</sup> | No<br>(n = 346) | Yes<br>(n = 11) | P-value <sup>a</sup> |
| Remission      | 224 (97.0)      | 7 (3.0)         | 0.5833               | 232 (99.2)      | 2 (0.9)         | 0.2528               | 101 (96.2)         | 4 (3.8)         | 0.0161               | 124 (95.4)      | 6 (4.6)         | 0.0391               |
| Mild           | 41 (95.4)       | 2 (4.7)         |                      | 46 (100.0)      | 0               |                      | 190 (90.9)         | 19 (9.1)        |                      | 187 (98.4)      | 3 (1.6)         |                      |
| Moderate       | 22 (95.7)       | 1 (4.4)         |                      | 20 (95.2)       | 1 (4.8)         |                      | 22 (88.0)          | 3 (12.0)        |                      | 33 (97.1)       | 1 (2.9)         |                      |
| Severe         | 0               | 0               |                      | 0               | 0               |                      | 10 (71.4)          | 4 (28.6)        |                      | 2 (66.7)        | 1 (33.3)        |                      |

Values are presented as number (%).

<sup>a</sup>Fisher exact test.
